# Supplementary material for: Effect of Fire Frequency on the Flammability of Two Mediterranean Pines: Link with Needle Terpene Content
Source: MDPI journal article supplement (doi:10.3390/plants10102164), 2021-10-12
Supplement: s1 [file s1]

# SUPPLEMENTARY MATERIALS

Table S1. Relationships between flammability variables (TTi: time-to-ignition; CW: Consumed weight; Tmax: Maximum temperature; FD: Flaming duration; FH: Flame height; RP: radiative peak) and flammability cofactors (SVR: Surface-to-volume ratio; FMC: Fuel moisture content) for shoots of *P. halepensis* and *P. sylvestris*. (One-way ANOVA; F = Fisher test, p = probability, NS= non significant).

| Shoots | <i>P. halepensis</i> |    |                   |    |                    |    | <i>P. sylvestris</i> |    |                    |    |                   |    |
|--------|----------------------|----|-------------------|----|--------------------|----|----------------------|----|--------------------|----|-------------------|----|
|        | SVR                  |    | Bulk density      |    | FMC                |    | SVR                  |    | Bulk density       |    | FMC               |    |
| TTi    | F= 20.7<br>0.0001    | p< | NS                |    | F= 43.4<br>0.0001  | p< | F= 23.5<br>0.0001    | p< | NS                 |    | F= 21.5<br>0.0001 | p< |
| CW     | F= 4.5<br>0.035      | p= | F= 4.4<br>0.027   | p= | F= 4.2<br>0.042    | p= | F= 10.0<br>0.002     | p= | NS                 |    | F= 8.0<br>0.0052  | p= |
| Tmax   | F= 4.5<br>0.035      | p= | F= 4.9<br>0.027   | p= | F= 67.4<br>0.0001  | p< | F= 7.8<br>0.006      | p= | F= 133.7<br>0.0001 | p< | F= 27.7<br>0.0001 | p< |
| FD     | F= 5.7<br>0.017      | p= | F= 4.4<br>0.036   | p= | NS                 |    | F= 25.5<br>0.0001    | p< | NS                 |    | NS                |    |
| FH     | NS                   |    |                   |    | F= 130.2<br>0.0001 | p< | F= 18.3<br>0.0001    | p< | F= 11.4<br>0.0009  | p= | F= 10.2<br>0.002  | p= |
| RP     | NS                   |    | F= 14.8<br>0.0001 | p= | F= 5.7<br>0.018    | p= | NS                   |    | F= 9.9<br>p= 0.002 |    | F= 5.5<br>0.020   | p= |

Table S2. Cofactors (SVR: surface-to-volume ratio; FMC: fuel moisture content; BD: bulk density) significantly related to each shoot flammability variable (using simple linear regression analyses) and results of one-way ANOVA (F = Fisher test, p = probability) performed on each corrected- flammability variable testing the difference between the two fire modalities for both species. In bold: significant results. PHF= *P. halepensis* "Fire" modality, PHNF= *P. halepensis* "No-Fire" modality, PSF= *P. sylvestris* "Fire" modality and PSNF= *P. sylvestris* "No-Fire" modality. N= 380 for *P. halepensis* and N= 293 for *P. sylvestris*.

| Shoots              | <i>P. halepensis</i>  |                                                         | <i>P. sylvestris</i>  |                                                         |
|---------------------|-----------------------|---------------------------------------------------------|-----------------------|---------------------------------------------------------|
|                     | Significant cofactors | ANOVA results on corrected flammability variable        | Significant cofactors | ANOVA results on corrected flammability variable        |
| Time-to-ignition    | SVR; FMC              | <b>F= 17.42 ; p &lt; 0.0001</b><br><b>PHF &lt; PHNF</b> | FMC; SVR              | F= 0.75 ; p= 0.3866                                     |
| Consumed weight     | SVR; BD; FMC          | F= 2.59 ; p= 0.1083                                     | FMC; SVR              | F= 2.13 ; p= 0.1453                                     |
| Maximum temperature | FMC; SVR; BD          | F= 0.00 ; p= 0.9607                                     | FMC; BD; SVR          | <b>F= 25.28 ; p &lt; 0.0001</b><br><b>PSF &gt; PSNF</b> |
| Flaming duration    | SVR; BD               | <b>F= 8.90 ; p= 0.0030</b><br><b>PHF &gt; PHNF</b>      | SVR                   | F= 0.65 ; p= 0.4200                                     |
| Flame height        | FMC                   | <b>F= 10.89 ; p= 0.0011</b><br><b>PHF &lt; PHNF</b>     | SVR; BD; FMC          | F= 2.35 ; p= 0.1263                                     |
| Radiative peak      | BD; FMC               | F= 2.35 ; p= 0.1263                                     | FMC; BD               | <b>F= 11.92 ; p= 0.0006</b><br><b>PSF &gt; PSNF</b>     |

Table S3. Relationships between flammability variables (TTi: time to ignition; CW: Consumed weight; Tmax: Maximum temperature; FD Flaming duration; FH: Flame height) and flammability cofactors (SVR: Surface-to-volume ratio) for litter of *P. halepensis* and *P. sylvestris*.

| Litter | <i>P. halepensis</i> |          | <i>P. sylvestris</i> |           |
|--------|----------------------|----------|----------------------|-----------|
|        | SVR                  |          | SVR                  |           |
| TTi    | NS                   |          | F= 20.1              | p< 0.0001 |
| CW     | NS                   |          | -                    |           |
| Tmax   | NS                   |          | NS                   |           |
| FD     | F= 6.1               | p= 0.014 | F= 4.6               | p= 0.033  |
| FH     | F= 5.7               | p= 0.018 | F= 4.5               | p= 0.035  |

Table S4. Cofactor (SVR: surface-to-volume ratio) significantly related to each litter flammability variable (using simple linear regression analyses; NS when non-significant) and results of one-way ANOVA (F = Fisher test, p = probability and KW = Kruskal-Wallis test, p = probability) performed on corrected-flammability variable (i.e. residuals extracted) testing the difference between both fire modalities for both species. In bold: significant results. PHF= *P. halepensis* "Fire" modality, PHNF= *P. halepensis* "No-Fire" modality, PSF= *P. sylvestris* "Fire" modality and PSNF= *P. sylvestris* "No-Fire" modality. N= 344 for *P. halepensis* and N= 279 for *P. sylvestris*. For *P. sylvestris*, consumed weight was 100% and the rate of spread was not measured so these variables were not taken into account in the analyses.

| Litter              | <i>P.halepensis</i>   |                                                           | <i>P. sylvestris</i>  |                                                          |
|---------------------|-----------------------|-----------------------------------------------------------|-----------------------|----------------------------------------------------------|
|                     | Significant cofactors | ANOVA results on corrected flammability variable          | Significant cofactors | ANOVA results on corrected flammability variable         |
| Time-to-ignition    | NS                    | <b>F= 34.48 ; p &lt; 0.0001</b><br><b>PHF &lt; PHNF</b>   | SVR                   | <b>KW = 10.63 ; p= 0.001</b><br><b>PSF &gt; PSNF</b>     |
| Consumed weight     | NS                    | <b>F= 10.17 ; p= 0.0016</b><br><b>PHF &gt; PHNF</b>       | -                     | -                                                        |
| Maximum temperature | NS                    | F= 0.01 ; p= 0.9222                                       | NS                    | <b>F= 23.09 ; p&lt; 0.0001</b><br><b>PSF &gt; PSNF</b>   |
| Flaming duration    | SVR                   | <b>F= 5.23 ; p= 0.0232</b><br><b>PHF &lt; PHNF</b>        | SVR                   | <b>KW = 18.94 ; p&lt; 0.0001</b><br><b>PSF &lt; PSNF</b> |
| Flame height        | SVR                   | <b>KW = 21.93 ; p &lt; 0.0001</b><br><b>PHF &gt; PHNF</b> | SVR                   | <b>F= 107.38 ; p&lt; 0.0001</b><br><b>PSF &lt; PSNF</b>  |
| Rate of spread      | NS                    | <b>F= 14.75 ; p= 0.0001</b><br><b>PHF &lt; PHNF</b>       | -                     | -                                                        |

Table S5. Terpene molecules identified in *P. halepensis* with their chemical formula and their concentration (mg g<sup>-1</sup> DM; mean  $\pm$  standard deviation) according to the fire modality.

|                        | Formule | "Fire"               | "No-Fire"            |
|------------------------|---------|----------------------|----------------------|
| Thujene                | C10H16  | 0.050 ( $\pm$ 0.044) | 0.038 ( $\pm$ 0.040) |
| $\alpha$ -pinene       | C10H16  | 0.737 ( $\pm$ 0.415) | 0.663 ( $\pm$ 0.463) |
| Camphene               | C10H16  | 0.008 ( $\pm$ 0.004) | 0.007 ( $\pm$ 0.005) |
| $\beta$ -pinene        | C10H16  | 0.428 ( $\pm$ 0.321) | 0.363 ( $\pm$ 0.308) |
| $\delta$ -3-carene     | C10H16  | 0.114 ( $\pm$ 0.112) | 0.092 ( $\pm$ 0.094) |
| $\alpha$ -terpinene    | C10H16  | 0.010 ( $\pm$ 0.009) | 0.008 ( $\pm$ 0.009) |
| Limonene               | C10H16  | 0.087 ( $\pm$ 0.084) | 0.077 ( $\pm$ 0.078) |
| Ocimene                | C10H16  | 0.069 ( $\pm$ 0.056) | 0.059 ( $\pm$ 0.057) |
| $\gamma$ -terpinene    | C10H16  | 0.042 ( $\pm$ 0.033) | 0.035 ( $\pm$ 0.033) |
| Terpinolene            | C10H16  | 0.506 ( $\pm$ 0.348) | 0.442 ( $\pm$ 0.384) |
| $\alpha$ -terpineol    | C10H18O | 0.014 ( $\pm$ 0.010) | 0.016 ( $\pm$ 0.016) |
| $\beta$ -caryophyllene | C15H24  | 2.555 ( $\pm$ 1.130) | 2.201 ( $\pm$ 1.228) |
| $\alpha$ -humulene     | C15H24  | 0.406 ( $\pm$ 0.208) | 0.342 ( $\pm$ 0.206) |
| Farnesene              | C15H24  | 0.223 ( $\pm$ 0.121) | 0.186 ( $\pm$ 0.105) |
| Germacrene-D           | C15H24  | 0.037 ( $\pm$ 0.032) | 0.033 ( $\pm$ 0.032) |
| Valencene              | C15H24  | 0.118 ( $\pm$ 0.140) | 0.910 ( $\pm$ 0.132) |
| $\alpha$ -muurolene    | C15H24  | 0.609 ( $\pm$ 0.969) | 0.602 ( $\pm$ 1.220) |
| $\gamma$ -cadinene     | C15H24  | 0.068 ( $\pm$ 0.063) | 0.049 ( $\pm$ 0.053) |
| $\beta$ -cadinene      | C15H24  | 0.317 ( $\pm$ 0.407) | 0.265 ( $\pm$ 0.385) |
| Elemol                 | C15H26O | 1.053 ( $\pm$ 1.231) | 0.837 ( $\pm$ 1.103) |
| Caryophyllene-oxide    | C15H24O | 0.772 ( $\pm$ 0.815) | 0.590 ( $\pm$ 0.598) |
| Cembrene               | C20H32  | 0.441 ( $\pm$ 0.703) | 0.293 ( $\pm$ 0.530) |
| Thunbergol             | C20H34O | 0.424 ( $\pm$ 0.641) | 0.324 ( $\pm$ 0.525) |

**Table S6.** Terpene molecules identified in *P. sylvestris* with their chemical formula and their concentration (mg g<sup>-1</sup> DM; mean  $\pm$  standard deviation) according to the fire modality.

|                        | Formule | "Fire"               | "No-Fire"            |
|------------------------|---------|----------------------|----------------------|
| Tricyclene             | C10H16  | 0.394 ( $\pm$ 0.40)  | 0.406 ( $\pm$ 0.404) |
| $\alpha$ -pinene       | C10H16  | 2.790 ( $\pm$ 1.072) | 1.072 ( $\pm$ 1.266) |
| Camphene               | C10H16  | 0.561 ( $\pm$ 0.360) | 0.535 ( $\pm$ 0.307) |
| $\beta$ -pinene        | C10H16  | 0.382 ( $\pm$ 0.310) | 0.324 ( $\pm$ 0.234) |
| $\beta$ -Myrcene       | C10H16  | 0.412 ( $\pm$ 0.408) | 0.438 ( $\pm$ 0.485) |
| $\alpha$ -phellandrene | C10H16  | 0.002 ( $\pm$ 0.006) | 0.001 ( $\pm$ 0.001) |
| $\delta$ -3-Carene     | C10H16  | 0.056 ( $\pm$ 0.183) | 0.102 ( $\pm$ 0.273) |
| $\alpha$ -terpinene    | C10H16  | 0.001 ( $\pm$ 0.002) | 0.001 ( $\pm$ 0.002) |
| Ocimene                | C10H14  | 0.001 ( $\pm$ 0.001) | < 0.001              |
| Limonene               | C10H16  | 0.053 ( $\pm$ 0.037) | 0.050 ( $\pm$ 0.035) |
| Eucalyptol             | C10H18O | 0.004 ( $\pm$ 0.007) | 0.003 ( $\pm$ 0.004) |
| $\beta$ -ocimene       | C10H16  | 0.156 ( $\pm$ 0.099) | 0.165 ( $\pm$ 0.081) |
| $\gamma$ -terpinene    | C10H16  | 0.006 ( $\pm$ 0.008) | 0.007 ( $\pm$ 0.009) |
| Terpinolene            | C10H16  | 0.019 ( $\pm$ 0.037) | 0.016 ( $\pm$ 0.024) |
| Linalool               | C10H18O | 0.001 ( $\pm$ 0.002) | 0.001 ( $\pm$ 0.002) |
| Camphor                | C10H16O | 0.003 ( $\pm$ 0.004) | 0.004 ( $\pm$ 0.004) |
| Borneol                | C10H18O | 0.010 ( $\pm$ 0.012) | 0.010 ( $\pm$ 0.012) |
| $\alpha$ -terpineol    | C10H18O | 0.009 ( $\pm$ 0.014) | 0.007 ( $\pm$ 0.007) |
| Nerol                  | C10H18O | < 0.001              | < 0.001              |
| Elemene                | C15H24  | 0.092 ( $\pm$ 0.135) | 0.075 ( $\pm$ 0.098) |
| $\alpha$ -cubebene     | C15H24  | 0.168 ( $\pm$ 0.216) | 0.185 ( $\pm$ 0.217) |
| Ylangene               | C15H24  | 0.023 ( $\pm$ 0.036) | 0.033 ( $\pm$ 0.069) |
| $\alpha$ -copaene      | C15H24  | 0.195 ( $\pm$ 0.245) | 0.207 ( $\pm$ 0.247) |
| $\beta$ -bourbonene    | C15H24  | 0.015 ( $\pm$ 0.022) | 0.017 ( $\pm$ 0.023) |
| $\beta$ -cubebene      | C15H24  | 0.050 ( $\pm$ 0.038) | 0.048 ( $\pm$ 0.036) |
| $\beta$ -elemene       | C15H24  | 0.033 ( $\pm$ 0.033) | 0.025 ( $\pm$ 0.028) |
| Longifolene            | C15H24  | < 0.001              | 0.001 ( $\pm$ 0.001) |
| $\beta$ -caryophyllene | C15H24  | 0.405 ( $\pm$ 0.176) | 0.443 ( $\pm$ 0.220) |
| Aromandendrene         | C15H24  | 0.024 ( $\pm$ 0.027) | 0.024 ( $\pm$ 0.028) |
| Humulene               | C15H24  | 0.066 ( $\pm$ 0.043) | 0.072 ( $\pm$ 0.047) |
| sesqui unk_34,5        | C15-    | 0.101 ( $\pm$ 0.102) | 0.084 ( $\pm$ 0.095) |
| sesqui unk_35,17       | C15-    | 0.185 ( $\pm$ 0.428) | 0.187 ( $\pm$ 0.345) |

|                                  |         |                |                |
|----------------------------------|---------|----------------|----------------|
| sesqui unk_35,28                 | C15-    | 0.375 (±0.476) | 0.339 (±0.380) |
| sesqui unk_35,46                 | C15-    | 0.020 (±0.023) | 0.021 (±0.024) |
| Valencene                        | C15H24  | 0.047 (±0.047) | 0.044 (±0.048) |
| $\alpha$ -Muurolene              | C15H24  | 0.066 (±0.066) | 0.071 (±0.070) |
| $\Upsilon$ -cadinene             | C15H24  | 0.463 (±0.310) | 0.451 (±0.323) |
| $\beta$ -cadinene                | C15H24  | 0.519 (±0.329) | 0.483 (±0.311) |
| $\alpha$ -cadinene               | C15H24  | 0.037 (±0.045) | 0.037 (±0.044) |
| $\alpha$ -bisabolol              | C15H26O | 0.006 (±0.011) | 0.008 (±0.013) |
| mix cyclic sesquiterpene alcohol | C15-    | 0.243 (±0.187) | 0.243 (±0.246) |
| Caryophyllene oxide              | C15H24O | 0.381 (±0.395) | 0.454 (±0.546) |
| $\tau$ -cadinol                  | C15H26O | 0.089 (±0.119) | 0.092 (±0.130) |
| $\alpha$ -cadinol                | C15H26O | 0.038 (±0.049) | 0.036 (±0.049) |

---

Table S7. Terpene molecules related to each flammability variable according to the fire modality (PH: *Pinus halepensis*; F: fire modality; NF: no-fire modality) for *P. halepensis*' shoot. Terpene molecules were considered as related to flammability when they were at the intersect of the two types of random forest analyses (i.e. VSURF and Boruta). In bold: common molecules to both fire modalities.

|                     | PHF                                                                                                                                                                                                      | PHNF                                                                                                       |
|---------------------|----------------------------------------------------------------------------------------------------------------------------------------------------------------------------------------------------------|------------------------------------------------------------------------------------------------------------|
| Time-to-ignition    | $\alpha$ -terpineol; <b>cembrene</b>                                                                                                                                                                     | $\beta$ -caryophyllene; <b>cembrene</b> ; elemol; terpinolene ; thujene                                    |
| Maximum temperature | $\alpha$ -humulene; $\beta$ -caryophyllene; <b>cembrene</b> ; germacrene-D ; limonene ; thujene                                                                                                          | $\alpha$ -muurolene; $\alpha$ -terpineol; $\beta$ -cadinene; caryophyllene-oxide; <b>cembrene</b> ; elemol |
| Flaming duration    | $\alpha$ -pinene; $\alpha$ -terpinene; $\beta$ -caryophyllene                                                                                                                                            | $\alpha$ -muurolene; cembrene; valencene                                                                   |
| Flame height        | <b><math>\alpha</math>-muurolene</b> ; $\alpha$ -pinene; $\beta$ -cadinene; <b>camphene</b> ; <b>caryophyllene-oxide</b> ; <b>cembrene</b> ; elemol; $\gamma$ -cadinene; germacrene-D; limonene; ocimene | $\alpha$ -muurolene; camphene; caryophyllene-oxide; cembrene; valencene                                    |
| Radiative peak      | $\alpha$ -pinene; $\alpha$ -humulene; <b><math>\beta</math>-caryophyllene</b> ; $\beta$ -pinene; camphene; caryophyllene-oxide; elemol; farnesene; terpinolene                                           | $\alpha$ -muurolene; <b><math>\beta</math>-caryophyllene</b> ; limonene                                    |
| Consumed weight     | $\alpha$ -humulene; <b><math>\alpha</math>-muurolene</b> ; $\alpha$ -terpinene; $\beta$ -pinene; $\beta$ -cadinene $\beta$ -caryophyllene; caryophyllene-oxide; elemol; farnesene                        | <b><math>\alpha</math>-muurolene</b> ; limonene; thunbergol; valencene                                     |

Table S8. Terpene molecules related to each flammability variable according to the fire modality (PH: *Pinus halepensis*; F: fire modality; NF: no-fire modality) for *P. halepensis*' litter. Terpene molecules were considered as related to flammability when they were at the intersect of the two types of random forest analyses (i.e. VSURF and Boruta). In bold: common molecules to both fire modalities.

|                     | PHF                                                                                                                                                                        | PHNF                                                                                                                                                                                     |
|---------------------|----------------------------------------------------------------------------------------------------------------------------------------------------------------------------|------------------------------------------------------------------------------------------------------------------------------------------------------------------------------------------|
| Time-to-ignition    | $\alpha$ -muurolene; $\alpha$ -terpinene; $\alpha$ -terpineol ;<br>farnesene ; $\gamma$ -terpinene; ocimene; thujene                                                       | $\beta$ -cadinene; cembrene; limonene                                                                                                                                                    |
| Maximum temperature | <b><math>\beta</math>-cadinene</b> ; camphene ; <b>elemol</b> ; ocimene;<br>valencene                                                                                      | $\alpha$ -terpineol; <b><math>\beta</math>-cadinene</b> ; <b>elemol</b> ; germacrene-D;<br>ocimene                                                                                       |
| Flaming duration    | <b>cembrene</b> ; elemol; $\gamma$ -cadinene; germacrene-D;<br>limonene                                                                                                    | $\alpha$ -muurolene; $\beta$ -cadinene; <b>cembrene</b>                                                                                                                                  |
| Flame height        | <b><math>\alpha</math>-pinene</b> ; <b><math>\alpha</math>-terpineol</b> ; <b><math>\beta</math>-caryophyllene</b> ;<br><b>camphene</b> ; germacrene-D; ocimene; valencene | $\alpha$ -humulene; <b><math>\alpha</math>-pinene</b> ; <b><math>\alpha</math>-terpineol</b> ; <b><math>\beta</math>-caryophyllene</b> ; <b>camphene</b> ; caryophyllene-oxide; limonene |
| Rate of spread      | cembrene                                                                                                                                                                   | camphene; caryophyllene-oxide; germacrene-D;<br>limonene; terpinolene; thujene; valencene                                                                                                |
| Consumed weight     | <b><math>\alpha</math>-terpineol</b> ; <b>camphene</b> ; ocimene; <b>valencene</b>                                                                                         | <b><math>\alpha</math>-terpineol</b> ; $\beta$ -cadinene; <b>camphene</b> ;<br>caryophyllene-oxide; cembrene; germacrene-D;<br>terpinolene; <b>valencene</b>                             |



Table S9. Terpene molecules related to each flammability variable according to the fire modality (PS: *Pinus sylvestris*; F: fire modality; NF: no-fire modality) for *P. sylvestris*' shoot. Terpene molecules were considered as related to flammability when they were at the intersect of the two types of random forest analyses (i.e. VSURF and Boruta). In bold: common molecules to both fire modalities.

|                     | PSF                                                                                                                                                          | PSNF                                                                                                                        |
|---------------------|--------------------------------------------------------------------------------------------------------------------------------------------------------------|-----------------------------------------------------------------------------------------------------------------------------|
| Time-to-ignition    | $\alpha$ -pinene; $\alpha$ -terpineol, tricyclene                                                                                                            | $\Delta$ -3-carene; humulene; unknown-sequi-35,46                                                                           |
| Maximum temperature | $\alpha$ -muurolene; $\alpha$ -terpinene; $\beta$ -myrcene; <b>borneol</b> ; elemene; $\gamma$ -terpinene; <b>unknown-sequi-34,5</b> ; tricyclene; valencene | $\Delta$ -3-carene; $\alpha$ -terpineol; $\beta$ -myrcene; <b>borneol</b> ; <b>unknown-sequi-34,5</b> ; unknown-sequi-35,46 |
| Flaming duration    | borneol; camphor; elemene                                                                                                                                    | -                                                                                                                           |
| Flame height        | $\alpha$ -phellandrene; $\alpha$ -terpineol; $\beta$ -myrcene; camphor; eucalyptol; tricyclene; valencene                                                    | aromadendrene; unknown-sequi-35,46; ylangene                                                                                |
| Radiative peak      | $\alpha$ -terpineol                                                                                                                                          | -                                                                                                                           |
| Consumed weight     | $\delta$ -3-carene; camphene; unknown-sequi-35,46                                                                                                            | -                                                                                                                           |

Table S10. Terpene molecules related to each flammability variable according to the fire modality (PS: *Pinus sylvestris*; F: fire modality; NF: no-fire modality) for *P. sylvestris*' litter. Terpene molecules were considered as related to flammability when they were at the intersect of the two types of random forest analyses (i.e. VSURF and Boruta). In bold: common molecules to both fire modalities.

|                     | PSF                                                                                                                                                                                                                                                                                                     | PSNF                                                                                                                          |
|---------------------|---------------------------------------------------------------------------------------------------------------------------------------------------------------------------------------------------------------------------------------------------------------------------------------------------------|-------------------------------------------------------------------------------------------------------------------------------|
| Time-to-ignition    | $\alpha$ -copaene; <b><math>\alpha</math>-terpineol</b> ; $\beta$ -bourbonene; humulene; linalool                                                                                                                                                                                                       | <b><math>\alpha</math>-terpineol</b> ; linalool; mix-sesquiterpene                                                            |
| Maximum temperature | $\delta$ -3-carene; $\alpha$ -bisabolol; $\alpha$ -cadinene; $\alpha$ -cadinol; $\alpha$ -copaene; $\alpha$ -cubebene; $\alpha$ -terpinene; $\beta$ -bourbonene; borneol; camphor; elemene; eucalyptol; humulene; linalool; unknown-sequi-35,17; <b>unknown-sequi-35,46</b> ; $\tau$ -cadinol; ylangene | $\alpha$ -phellandrene; $\alpha$ -terpineol; $\beta$ -caryophyllene; <b>unknown-sequi-35,46</b>                               |
| Flame height        | $\alpha$ -cadinol; $\alpha$ -terpineol; $\beta$ -bourbonene; elemene; eucalyptol; humulene; <b>linalool</b> ; ocimene; unknown-sequi-35,17; $\tau$ -cadinol; <b>tricyclene</b>                                                                                                                          | $\delta$ -3-carene; $\beta$ -myrcene; $\beta$ -caryophyllene; caryophyllene-oxide; <b>linalool</b> ; nerol; <b>tricyclene</b> |
| Flaming duration    | $\alpha$ -terpineol; ; $\beta$ -bourbonene; borneol; linalool; ylangene                                                                                                                                                                                                                                 | -                                                                                                                             |

Table S11. Partial least square (PLS) regression analyses (p= p value, R<sup>2</sup>= determination coefficient, Cp= number of component) performed on both fire modalities (PH: *Pinus halepensis*; F: fire modality; NF: no-fire modality) and each *P. halepensis*' shoots flammability variables highlighting the scaled regression coefficients (R) of the significant terpene molecules. In bold: main flammability driver. MT: Monoterpenes; ST: Sesquiterpenes; DT: Diterpenes.

|                     | PHF                                                                                                                                              |                                                              | PHNF                                                                                                    |                                        |
|---------------------|--------------------------------------------------------------------------------------------------------------------------------------------------|--------------------------------------------------------------|---------------------------------------------------------------------------------------------------------|----------------------------------------|
| Time-to-ignition    | <b>α-terpineol (MT)</b><br>p< 0.0001 ; R <sup>2</sup> = 0.18 ; Cp = 1                                                                            | <b>R= 0.43</b>                                               | NS                                                                                                      |                                        |
| Maximum temperature | α-humulene (ST)<br><b>β-caryophyllene (ST)</b><br>limonene (MT)<br>thujene (MT)<br>p< 0.0001 ; R <sup>2</sup> = 0.50 ; Cp = 4                    | R= -1,65<br><b>R= 2.17</b><br>R= -0.31<br><b>R= 0.28</b>     | <b>α-terpineol (MT)</b><br>p< 0.0001 ; R <sup>2</sup> = 0.44 ; Cp = 1                                   | <b>R= 0.66</b>                         |
| Flaming duration    | NS                                                                                                                                               |                                                              | <b>valencene (ST)</b><br>p= 0.002 ; R <sup>2</sup> = 0.06 ; Cp = 1                                      | <b>R= -0.24</b>                        |
| Flame height        | camphene (MT)<br><b>elemol (ST)</b><br>γ-cadinene (ST)<br>p< 0.0001 ; R <sup>2</sup> = 0.51 ; Cp = 2                                             | R= -0.47<br><b>R= 2.24</b><br>R= 0.30                        | <b>camphene (MT)</b><br>cembrene (DT)<br>valencene (ST)<br>p< 0.0001 ; R <sup>2</sup> = 0.45 ; Cp = 2   | <b>R= -0.53</b><br>R= 0.23<br>R= 0.28  |
| Radiative peak      | camphene (MT)<br>α-pinene (MT)<br>β-caryophyllene (ST)<br><b>β-pinene (MT)</b><br>terpinolene (MT)<br>p< 0.0001 ; R <sup>2</sup> = 0.24 ; Cp = 5 | R= 0.22<br>R= -0.52<br>R= 0.51<br><b>R= 0.61</b><br>R= -0.52 | <b>β-caryophyllene (ST)</b><br><b>limonene (MT)</b><br>p= 0.003 ; R <sup>2</sup> = 0.07 ; Cp = 2        | <b>R= 0.29</b><br><b>R= -0.29</b>      |
| Consumed weight     | NS                                                                                                                                               |                                                              | α-humulene (ST)<br><b>limonene (MT)</b><br>thunbergol (DT)<br>p= 0.002 ; R <sup>2</sup> = 0.09 ; Cp = 3 | R= 0.30<br><b>R= -0.31</b><br>R= -0.24 |

Table S12. Partial least square (PLS) regression analyses (p= p value, R<sup>2</sup>= determination coefficient, Cp= number of component, NS=non-significant) performed on both fire modalities (PH: *Pinus halepensis*; F: fire modality; NF: no-fire modality) and each *P. halepensis*' litter flammability variables and highlighting the scaled regression coefficients (R) of the significant terpene molecules. In bold: main flammability driver. MT: Monoterpenes; ST: Sesquiterpenes; DT: Diterpenes.

|                     | PHF                                        |                 |                | PHNF                                       |                 |
|---------------------|--------------------------------------------|-----------------|----------------|--------------------------------------------|-----------------|
| Time-to-ignition    | $\alpha$ -terpinene (MT)                   | R= 0,55         |                | <b>limonene (MT)</b>                       | <b>R= -0.25</b> |
|                     | <b><math>\gamma</math>-terpinene (MT)</b>  | <b>R= -1.05</b> |                | p= 0.003 ; R <sup>2</sup> = 0.06 ; Cp = 1  |                 |
|                     | ocimene (MT)                               | R= -0.34        |                |                                            |                 |
|                     | thujene (MT)                               | R= 0.60         |                |                                            |                 |
|                     | p< 0.0001 ; R <sup>2</sup> = 0.14 ; Cp = 4 |                 |                |                                            |                 |
| Maximum temperature | <b><math>\beta</math>-cadinene (ST)</b>    | <b>R= -0.62</b> |                |                                            |                 |
|                     | camphene (MT)                              | R= 0.42         |                | <b><math>\alpha</math>-terpineol (MT)</b>  | <b>R= 0.57</b>  |
|                     | elemol (ST)                                | R= 0.52         |                | elemol (ST)                                | R= -0.20        |
|                     | ocimene (MT)                               | R= -0.39        |                | p< 0.0001 ; R <sup>2</sup> = 0.44 ; Cp = 1 |                 |
|                     | valencene (ST)                             | R= -0.30        |                |                                            |                 |
|                     | p< 0.0001 ; R <sup>2</sup> = 0.57 ; Cp = 4 |                 |                |                                            |                 |
| Flaming duration    | elemol (ST)                                | R= 0.20         |                | <b><math>\beta</math>-cadinene (ST)</b>    | <b>R= -0.24</b> |
|                     | <b>limonene (MT)</b>                       |                 | <b>R= 0.30</b> | cembrene (DT)                              | R= -0.22        |
|                     | p< 0.0001 ; R <sup>2</sup> = 0.21 ; Cp = 1 |                 |                | p< 0.0001 ; R <sup>2</sup> = 0.17 ; Cp = 1 |                 |
| Flame height        |                                            |                 |                | <b><math>\alpha</math>-humulene (ST)</b>   | <b>R= -0.49</b> |
|                     | $\alpha$ -pinene (MT)                      | R= 0.27         |                | $\alpha$ -pinene (MT)                      | R= -0.23        |
|                     | $\beta$ -caryophyllene (ST)                | R= 0.33         |                | $\beta$ -caryophyllene (ST)                | R= 1.18         |
|                     | camphene (MT)                              | R= -0.33        |                | p< 0.0001 ; R <sup>2</sup> = 0.33 ; Cp = 2 |                 |
|                     | germacrene D (ST)                          | R= -0.34        |                |                                            |                 |
|                     | <b>ocimene (MT)</b>                        | <b>R= -0.40</b> |                |                                            |                 |
|                     | p< 0.0001 ; R <sup>2</sup> = 0.21 ; Cp = 5 |                 |                |                                            |                 |
| Rate of spread      |                                            | NS              |                | <b>terpinolene (MT)</b>                    | <b>R= 0.27</b>  |
|                     |                                            |                 |                | valencene (ST)                             | R= -0.26        |
|                     |                                            |                 |                | p= 0.003 ; R <sup>2</sup> = 0.11 ; Cp = 2  |                 |
| Consumed weight     | <b><math>\alpha</math>-terpineol (MT)</b>  | <b>R= -0.47</b> |                | $\alpha$ -terpineol (MT)                   | R= -0.23        |
|                     | p< 0.0001 ; R <sup>2</sup> = 0.22 ; Cp = 1 |                 |                | camphene (MT)                              | R= -0.22        |
|                     |                                            |                 |                | <b>caryophyllene-oxide (ST)</b>            | <b>R= 0.28</b>  |
|                     |                                            |                 |                | p< 0.0001 ; R <sup>2</sup> = 0.27 ; Cp = 1 |                 |

Table S13. Partial least square (PLS) regression analyses (p= p value, R<sup>2</sup>= determination coefficient, Cp= number of component, NS=non-significant) performed on both fire modalities (PS: *Pinus sylvestris*; F: fire modality; NF: no-fire modality) and each *P. sylvestris*' shoot flammability variables and highlighting the scaled regression coefficients (R) of the significant terpene molecules. In bold: main flammability driver. MT: Monoterpenes; ST: Sesquiterpenes.

|                     | PSF                                        |                | PSNF                                       |                |
|---------------------|--------------------------------------------|----------------|--------------------------------------------|----------------|
|                     | NS                                         |                | NS                                         |                |
| Time-to-ignition    |                                            |                |                                            |                |
| Maximum temperature | <b>borneol (MT)</b>                        | <b>R= 0.41</b> | <b><math>\alpha</math>-terpineol (MT)</b>  | <b>R= 0.35</b> |
|                     | elemene (ST)                               | R= -0.25       | $\beta$ -myrcene (MT)                      | R= -0.25       |
|                     | $\gamma$ -terpinene (MT)                   | R= -0.26       | unknown-sequi-35,46 (ST)                   | R= -0.31       |
|                     | p< 0.0001 ; R <sup>2</sup> = 0.60 ; Cp = 3 |                | p< 0.0001 ; R <sup>2</sup> = 0.62 ; Cp = 1 |                |
| Flaming duration    | NS                                         |                | NS                                         |                |
| Flame height        | $\alpha$ -terpineol (MT)                   | R= -0.22       | <b>aromadendrene (ST)</b>                  | <b>R= 0.23</b> |
|                     | $\beta$ -myrcene (MT)                      | R= 0.22        | unknown-sequi-35,46 (ST)                   | R= 0.22        |
|                     | <b>tricyclene (MT)</b>                     | <b>R= 0.24</b> | p< 0.0001 ; R <sup>2</sup> = 0.18 ; Cp = 1 |                |
|                     | p< 0.0001 ; R <sup>2</sup> = 0.24 ; Cp = 2 |                |                                            |                |
| Radiative peak      | NS                                         |                | NS                                         |                |
| Consumed weight     | $\delta$ -3-carene (MT)                    | R= 0.20        | NS                                         |                |
|                     | <b>unknown-sequi-35,46 (ST)</b>            | <b>R= 0.30</b> |                                            |                |
|                     | p< 0.0001 ; R <sup>2</sup> = 0.14 ; Cp = 1 |                |                                            |                |

Table S14. Partial least square (PLS) regression analyses (p= p value, R<sup>2</sup>= determination coefficient, Cp= number of component, NS=non-significant) performed on both fire modalities modalities (PS: *Pinus sylvestris*; F: fire modality; NF: no-fire modality) and each *P. sylvestris*' litter flammability variables and highlighting the scaled regression coefficients (R) of the significant terpene molecules. In bold: main flammability driver. MT: Monoterpenes; ST: Sesquiterpenes.

|                     | PSF                                                                                                                                                                                                                                                                                                                      | PSNF                                                                                                                                              |
|---------------------|--------------------------------------------------------------------------------------------------------------------------------------------------------------------------------------------------------------------------------------------------------------------------------------------------------------------------|---------------------------------------------------------------------------------------------------------------------------------------------------|
| Time-to-ignition    | <b><math>\alpha</math>-copaene (ST)</b> R= <b>0.24</b><br>$\beta$ -bourbonene (ST) R= 0.21<br>linalool (MT) R= 0.22<br>p< 0.0001 ; R <sup>2</sup> = 0.31 ; Cp = 1                                                                                                                                                        | $\alpha$ -terpineol (MT) R= -0.22<br><b>linalool (MT)</b> R= <b>0.23</b><br>p< 0.0001 ; R <sup>2</sup> = 0.16 ; Cp = 2                            |
| Maximum temperature | $\tau$ -cadinol (ST) R= 0.39<br>$\alpha$ -cadinene (ST) R= 0.37<br>$\alpha$ -cadinol (ST) R= -0.47<br><b><math>\alpha</math>-copaene (ST)</b> R= <b>-0.51</b><br>borneol (MT) R= 0.25<br>camphor (MT) R= 0.31<br>elemene (ST) R= -0.38<br>unknown-sequi-35,46 (ST) R= 0.29<br>p< 0.0001 ; R <sup>2</sup> = 0.57 ; Cp = 8 | <b><math>\alpha</math>-phellandrene (ST)</b> R= <b>-0.24</b><br>$\beta$ -caryophyllene (ST) R= 0.21<br>p= 0.0006 ; R <sup>2</sup> = 0.11 ; Cp = 1 |
| Flaming duration    | $\alpha$ -terpineol (MT) R= 0.26<br><b>borneol (MT)</b> R= <b>0.37</b><br>linalool (MT) R= -0.32<br>p< 0.0001 ; R <sup>2</sup> = 0.41 ; Cp = 2                                                                                                                                                                           | NS                                                                                                                                                |
| Flame height        | <b><math>\tau</math>-cadinol (ST)</b> R= <b>0.47</b><br>$\alpha$ -cadinol (ST) R= -0.25<br>$\alpha$ -terpineol (MT) R= -0.28<br>linalool (MT) R= 0.20<br>tricyclene (MT) R= -0.34<br>p< 0.0001 ; R <sup>2</sup> = 0.45 ; Cp = 5                                                                                          | NS                                                                                                                                                |
